# Supplementary material for: Functional modulation of LHCSR1 protein from Physcomitrella patens by zeaxanthin binding and low pH
Source: PubMed Central journal article supplement (PMC5593824; doi:10.1038/s41598-017-11101-7), 2017-09-11

# **Functional modulation of LHCSR1 protein from *Physcomitrella patens* by zeaxanthin binding and low pH**

**Alberta Pinnola<sup>1</sup>, Matteo Ballottari<sup>1</sup>, Ilaria Bargigia<sup>2</sup>, Marcelo Alcocer<sup>2</sup>, Cosimo D'Andrea<sup>2,3</sup>, Giulio Cerullo<sup>3</sup> and Roberto Bassi<sup>1,4\*</sup>**

<sup>1</sup> Dipartimento di Biotecnologie, Università di Verona, Strada Le Grazie 15, I-37134 Verona, Italy

<sup>2</sup> Center for Nano Science and Technology @PoliMi, Istituto Italiano di Tecnologia, via Pascoli 70/3, 20133 Milano, Italy

<sup>3</sup> IFN-CNR, Department of Physics, Politecnico di Milano, P.za L. da Vinci 32, 20133 Milano, Italy

<sup>4</sup> Consiglio Nazionale delle Ricerche (CNR), Istituto per la Protezione delle Piante (IPP), Via Madonna del Piano 10, 50019 Sesto Fiorentino, Firenze, Italy.

\*Corresponding author: roberto.bassi@univr.it

**SUPPLEMENTAL DATA**

**Table S1: Results of global analysis of fluorescence decay kinetics on LHCII isolated proteins. 2D**

Streak camera maps were fitted with two exponential function with a global analysis method. Amplitude and time constants are reported. Average fluorescence lifetimes were calculated as  $\sum A_i \tau_i / \sum A_i$

| <b>SAMPLE</b>                   | <b>A1</b> | <b><math>\tau_1</math> (ps)</b> | <b>A2</b> | <b><math>\tau_1</math> (ps)</b> | <b><math>\tau_{avg}</math> (ps)</b> |
|---------------------------------|-----------|---------------------------------|-----------|---------------------------------|-------------------------------------|
| <b>LHCII pH 7.5 0.03% a-DM</b>  | 16%       | 241                             | 84%       | 3753                            | 3195                                |
| <b>LHCII pH 5 0.03% a-DM</b>    | 19%       | 297                             | 81%       | 3933                            | 3249                                |
|                                 |           |                                 |           |                                 |                                     |
| <b>LHCII pH 7.5 0.007% a-DM</b> | 24%       | 304                             | 76%       | 3871                            | 2992                                |
| <b>LHCII pH 5 0.007% a-DM</b>   | 58%       | 407                             | 42%       | 3403                            | 1654                                |
|                                 |           |                                 |           |                                 |                                     |
| <b>LHCII pH 7.5 0.003% a-DM</b> | 53%       | 325                             | 47%       | 3069                            | 1604                                |
| <b>LHCII pH 5 0.003% a-DM</b>   | 76%       | 395                             | 24%       | 1373                            | 630                                 |

**Figure S1: Fluorescence decay kinetics and integrated spectra of LHCII at different pH and detergent concentration.** Fluorescence decay kinetics were measured at three detergent concentrations (0.03%, 0.007% and 0.003%  $\alpha$ -DM, Panels A, C and E respectively) at two different pH (7.5 and 5). Integrated spectra are reported in Panel B, D and E.

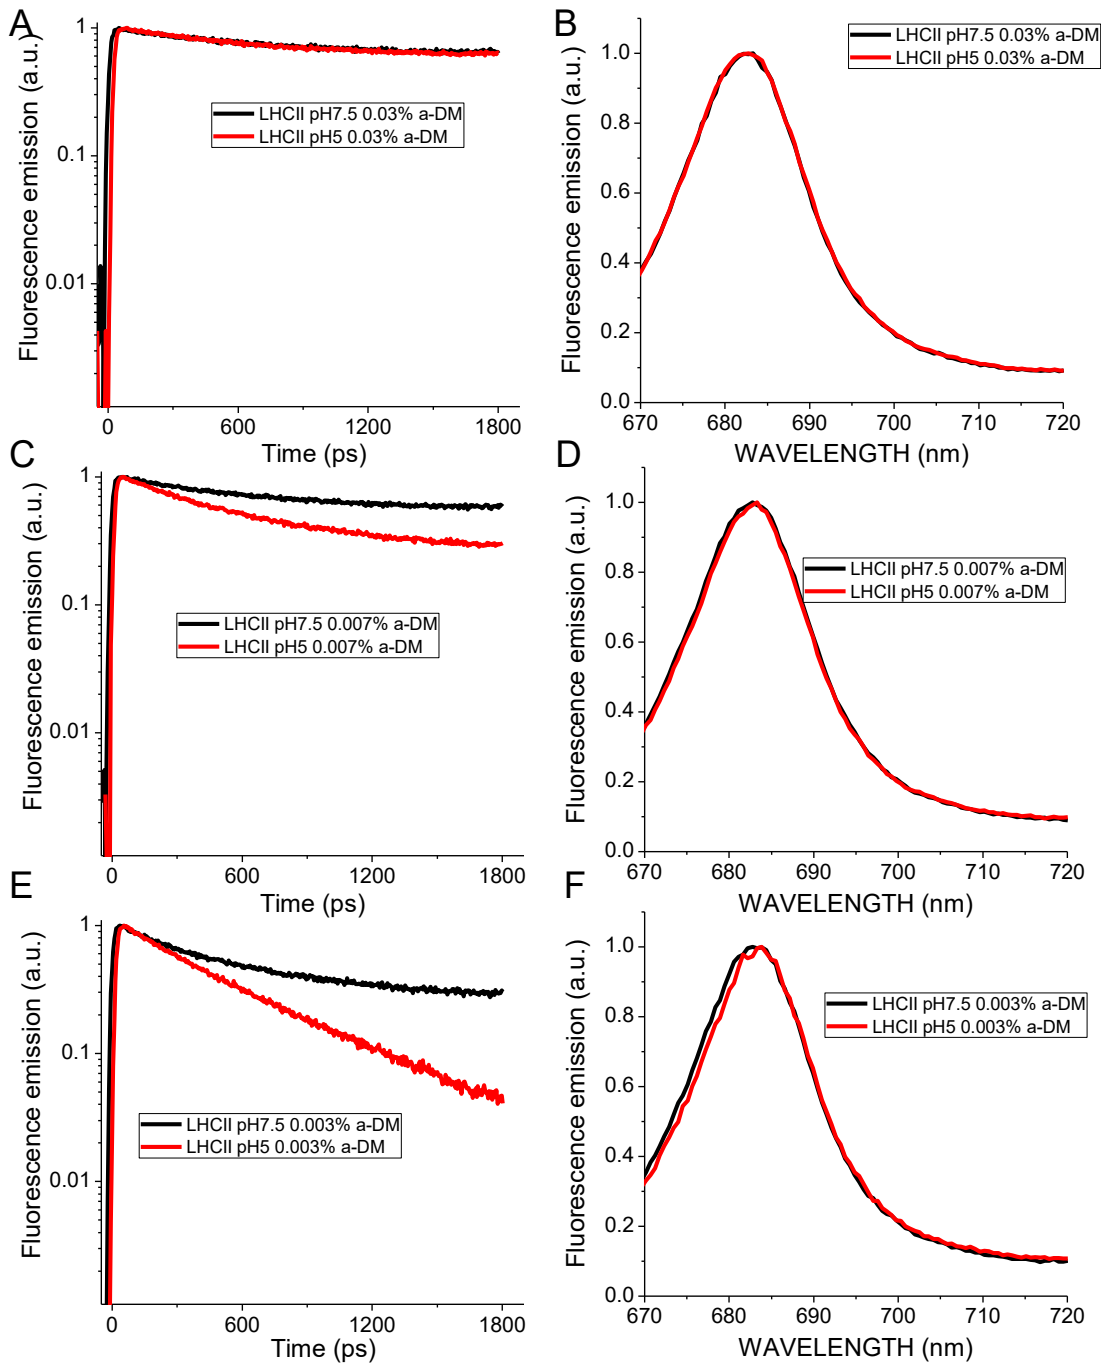

**Figure S2: Decay Associated Spectra (DAS) resulting from global analysis of LHCII fluorescence decay maps.** Streak camera fluorescence decay maps recorded for LHCII at different detergent concentration (0.03%, 0.007% and 0.003%  $\alpha$ -DM) and pH (7.5 and 5) were fitted with a global analysis method with two exponential functions. DAS obtained are reported, in dashed line the longest component and in solid line the shortest.

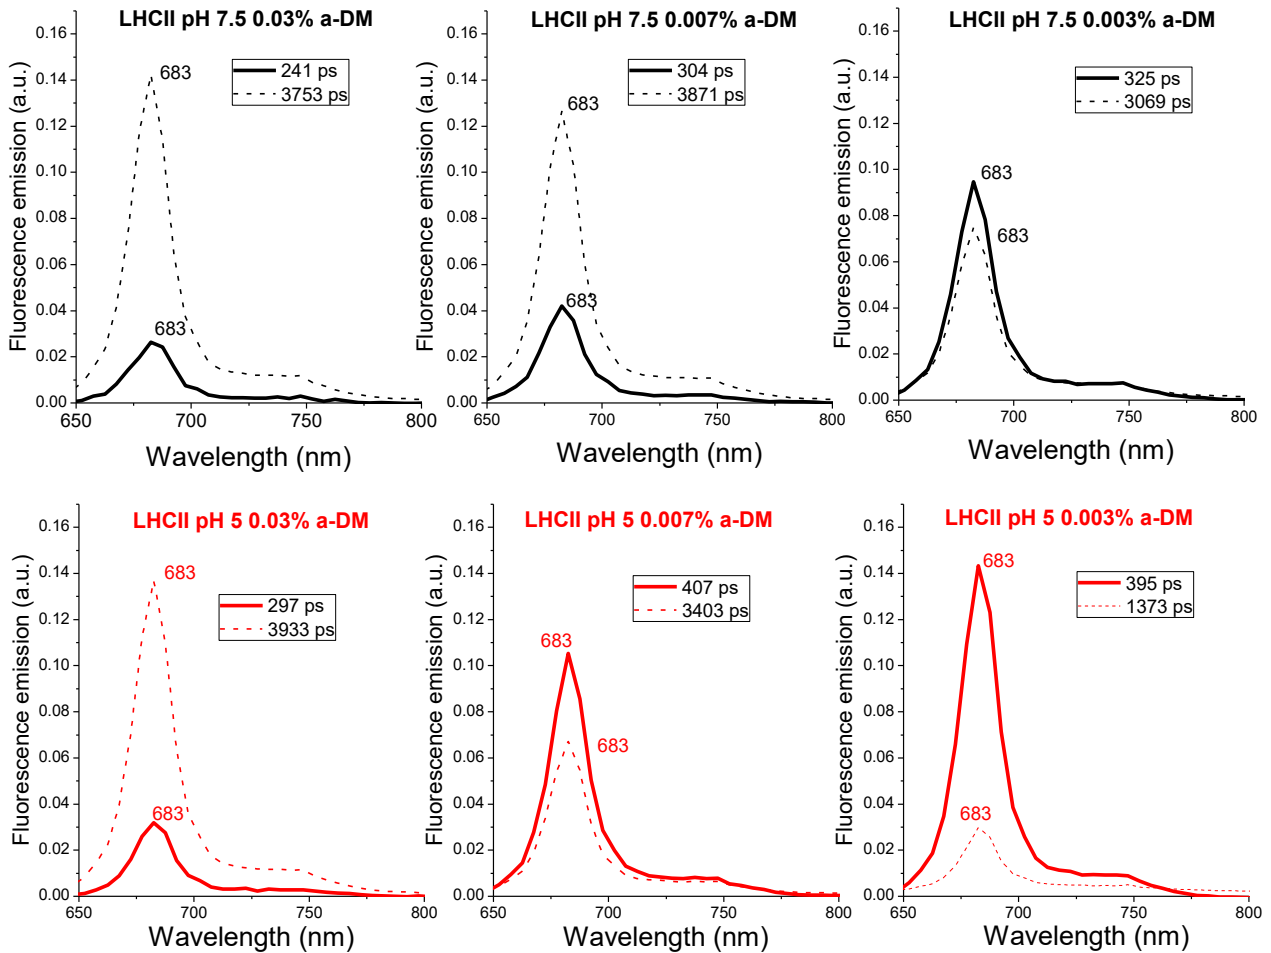

**Figure S3: Deconvolution of LHCSR1 absorption spectra in Qy region.** LHCSR1-ctrl and -dep absorption spectra in the red region at pH 7.5 or pH 5 at 0.003% or 0.007% were fitted with three chlorophyll b and seven chlorophyll a spectral forms. The amplitude of the chlorophylls spectral forms are reported in Panel I and J for LHCSR1-ctrl and -dep respectively.

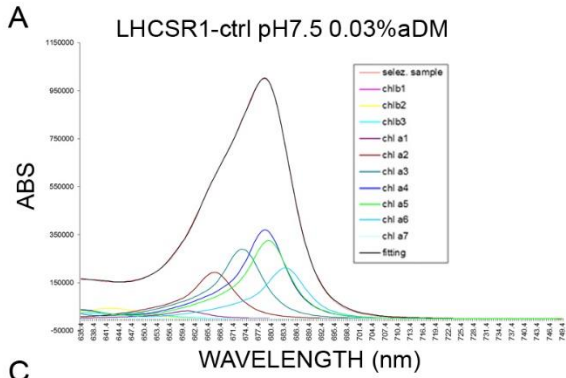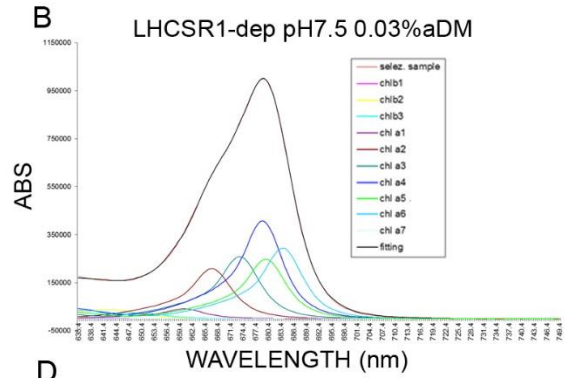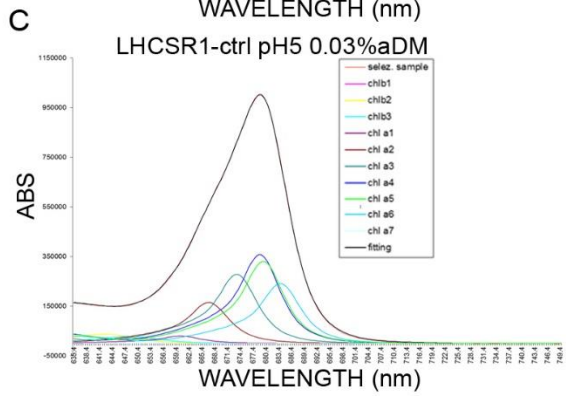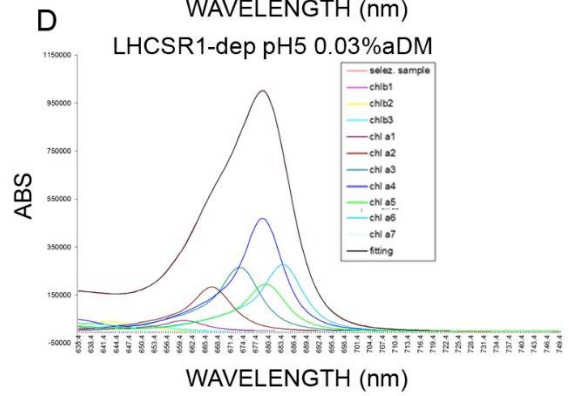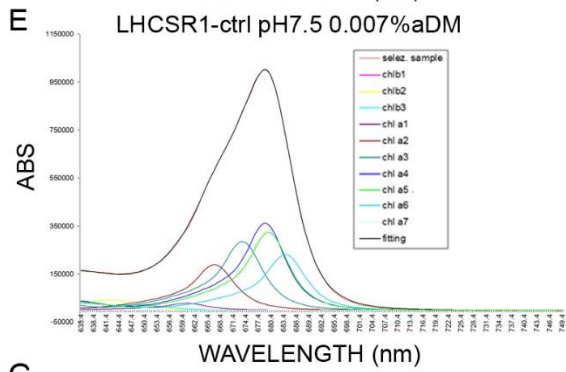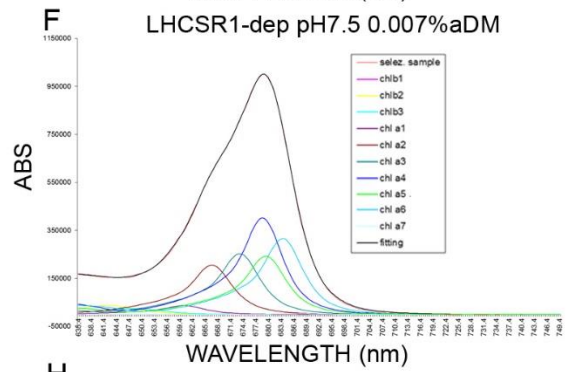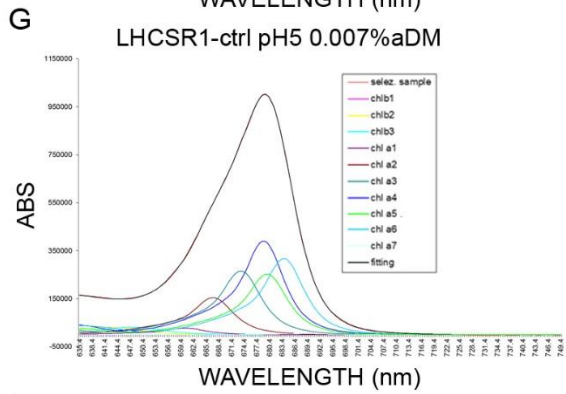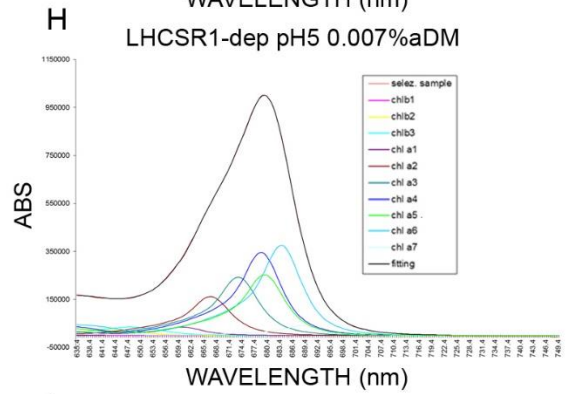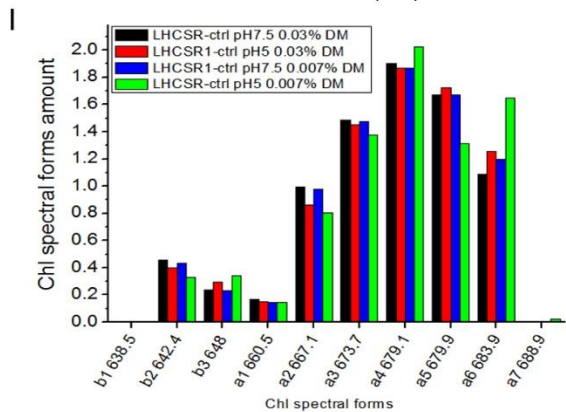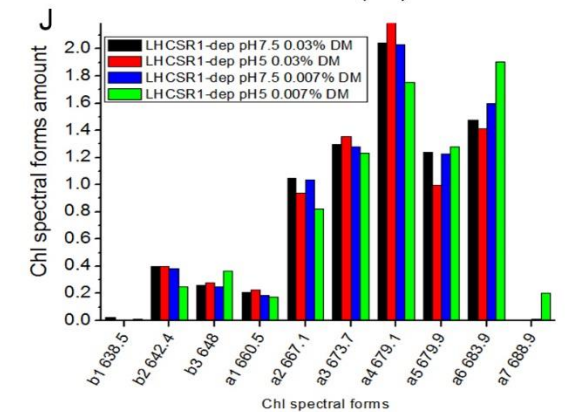

Supplement: 41598_2017_11101_MOESM1_ESM.pdf [file 41598_2017_11101_MOESM1_ESM.pdf]
